## **The Effect of Blood Cholinesterase Level on Health Symptoms among Chili Farmers in Sakon Nakhon Province, Thailand.**

**Ratchadaporn Pengpan <sup>1</sup>, Ratane Kammolkon <sup>1\*</sup>**

The authors have withdrawn their manuscript whilst they perform additional experiments to test some of their conclusions further. Therefore, the authors do not wish this work to be cited as reference for the project. If you have any questions, please contact the corresponding author.
